# Supplementary material for: The effect of obliquity on temperature in subduction zones: insights from 3-D numerical modeling
Source: Copernicus journal article supplement (doi:10.5194/se-9-759-2018), 2018-06-14
Supplement: Supplementary file [file se-9-759-2018-supplement-title-page.pdf › se-9-759-2018-supplement-title-page.pdf]

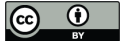

## *Supplement of*

# **The effect of obliquity on temperature in subduction zones: insights from 3-D numerical modeling**

**Alexis Plunder et al.**

*Correspondence to:* Alexis Plunder ([alex.plunder@gmail.com](mailto:alex.plunder@gmail.com))

- [se-9-759-2018-supplement-title-page.pdf](#)
- [atan05\\_20.gif](#)
- [atan10\\_20.gif](#)
- [atan40\\_05.gif](#)
- [sin20\\_1.gif](#)
- [sin20\\_2.gif](#)
- [sin40\\_1.gif](#)
- [sin40\\_2.gif](#)
- [sin60\\_1.gif](#)
- [sin60\\_2.gif](#)

The copyright of individual parts of the supplement might differ from the CC BY 4.0 License.
